# Supplementary figures and images for: Insulin glycation coupled with liposomal lipid peroxidation and microglial cell death
Source: Royal Society of Chemistry journal article supplement (doi:10.1039/c4ra16420b), 2015-01-01

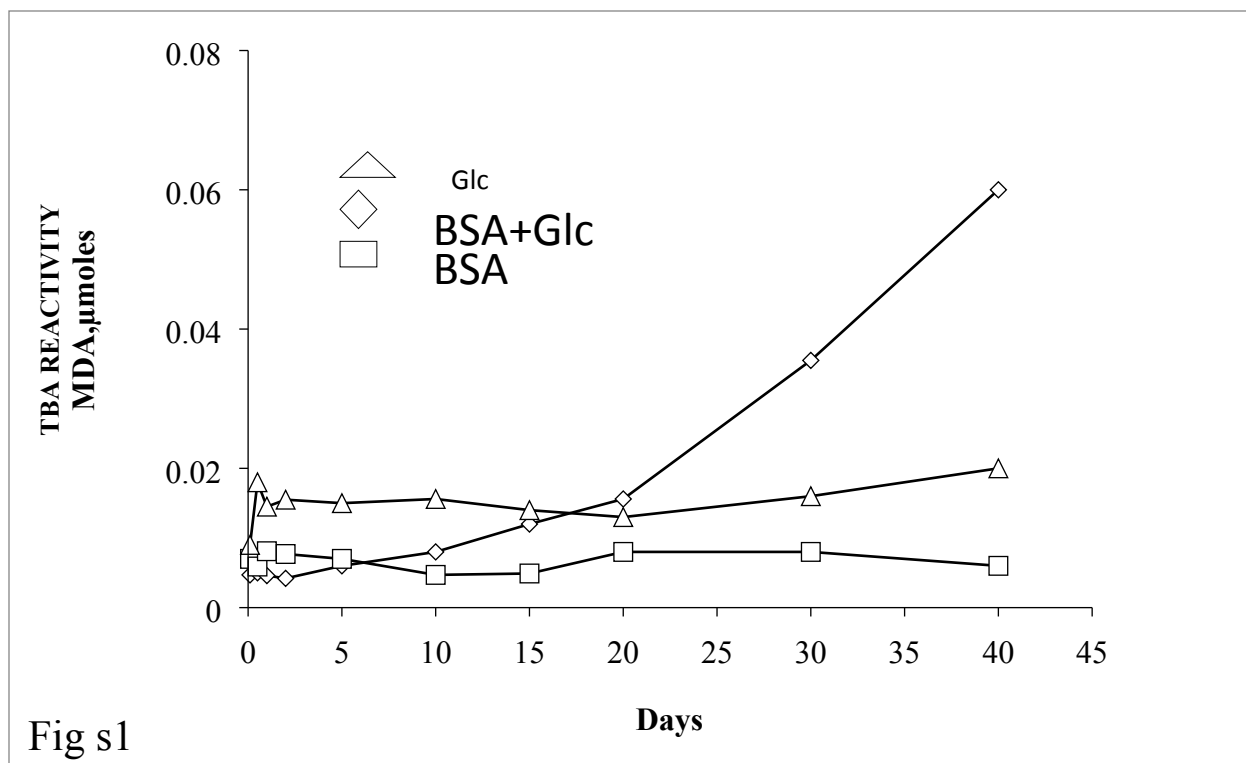

Supplement: c4ra16420b1.pdf [file c4ra16420b1.pdf]
